# Supplementary material for: NKp30 Receptor Upregulation in Salivary Glands of Sjögren’s Syndrome Characterizes Ectopic Lymphoid Structures and Is Restricted by Rituximab Treatment
Source: PubMed Central journal article supplement (PMC8477027; doi:10.3389/fimmu.2021.706737), 2021-09-14

**Figure Supplementary 3**

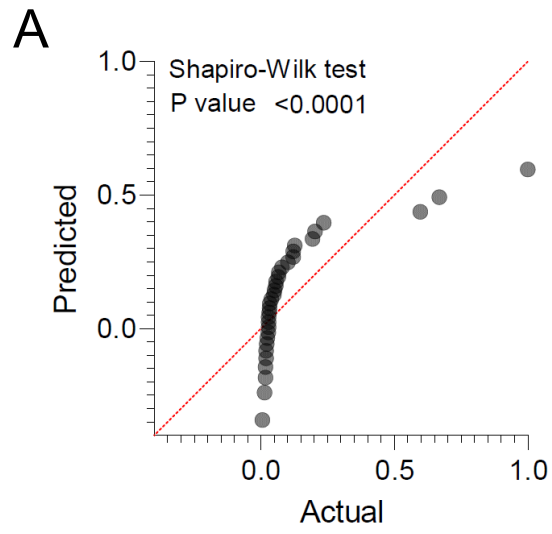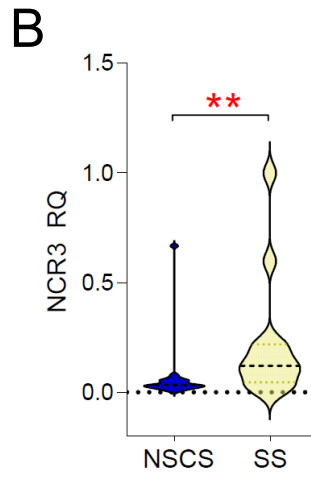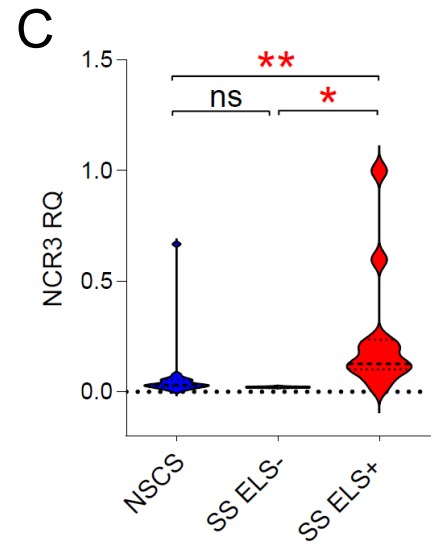

Supplement: Image_3.pdf [file Image_3.pdf]
